# Supplementary material for: Comparison of uncertainties in land-use change fluxes from bookkeeping model parameterisation
Source: Copernicus journal article supplement (doi:10.5194/esd-12-745-2021), 2021-06-30
Supplement: Supplementary file [file esd-12-745-2021-supplement-title-page.pdf › esd-12-745-2021-supplement-title-page.pdf]

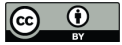

## *Supplement of*

# **Comparison of uncertainties in land-use change fluxes from bookkeeping model parameterisation**

**Ana Bastos et al.**

*Correspondence to:* Ana Bastos ([abastos@bgc-jena.mpg.de](mailto:abastos@bgc-jena.mpg.de))

- [esd-12-745-2021-supplement-title-page.pdf](#)
- [BLUE\\_HNAlloc\\_RegionalFluxes.csv](#)
- [BLUE\\_HNCdens\\_RegionalFluxes.csv](#)
- [BLUE\\_HNt\\_RegionalFluxes.csv](#)
- [BLUE\\_SBL-net\\_RegionalFluxes.csv](#)
- [BLUE\\_SBL\\_RegionalFluxes.csv](#)
- [BLUE\\_SHNFull\\_RegionalFluxes.csv](#)
- [HN2017\\_RegionalFluxes.csv](#)
- [ReadME.rtf](#)

The copyright of individual parts of the supplement might differ from the article licence.
